# Supplementary material for: An activity-calibrated chemical standardization approach for quality evaluation of Salvia miltiorrhiza Bge.
Source: Royal Society of Chemistry journal article supplement (doi:10.1039/c6ra26281c), 2017-01-01
Supplement: c6ra26281c1.pdf [file c6ra26281c1.pdf]

Table S1 Determined content results of nine constituents (N= 6).

| Content (mg g <sup>-1</sup> )          | S1    | S2    | S3    | S4    | S5    | S6    | S7    | S8    | S9    | S10   |
|----------------------------------------|-------|-------|-------|-------|-------|-------|-------|-------|-------|-------|
| DSS                                    | 2.46± | 2.58± | 1.61± | 2.53± | 2.59± | 2.16± | 1.52± | 1.28± | 1.44± | 1.23± |
|                                        | 0.07  | 0.01  | 0.05  | 0.02  | 0.03  | 0.08  | 0.07  | 0.03  | 0.05  | 0.03  |
| ProA                                   | 0.06± | 0.06± | 0.07± | 0.07± | 0.07± | 0.12± | 0.07± | 0.09± | 0.09± | 0.06± |
|                                        | 0.01  | 0.01  | 0.01  | 0.01  | 0.01  | 0.01  | 0.01  | 0.01  | 0.01  | 0.01  |
| RosA                                   | 2.37± | 3.24± | 2.80± | 5.18± | 4.03± | 4.93± | 4.40± | 4.11± | 4.58± | 2.77± |
|                                        | 0.03  | 0.05  | 0.03  | 0.02  | 0.08  | 0.04  | 0.05  | 0.02  | 0.05  | 0.03  |
| SalB                                   | 30.33 | 27.78 | 33.38 | 33.56 | 41.18 | 61.05 | 58.70 | 49.98 | 61.61 | 59.99 |
|                                        | ±0.16 | ±0.23 | ±0.18 | ±0.09 | ±0.27 | ±0.45 | ±0.36 | ±0.27 | ±0.33 | ±0.21 |
| SalA                                   | 0.49± | 0.42± | 0.27± | 2.78± | 1.95± | 0.27± | 1.17± | 1.36± | 1.31± | 0.99± |
|                                        | 0.01  | 0.01  | 0.01  | 0.02  | 0.02  | 0.01  | 0.01  | 0.01  | 0.02  | 0.01  |
| ET1                                    | 0.03± | 0.00± | 0.17± | 3.16± | 0.51± | 0.26± | 0.38± | 1.03± | 0.88± | 0.26± |
|                                        | 0.01  | 0.00  | 0.01  | 0.03  | 0.01  | 0.01  | 0.01  | 0.01  | 0.01  | 0.01  |
| CT                                     | 0.91± | 0.52± | 0.34± | 2.77± | 1.81± | 0.70± | 0.77± | 1.90± | 1.86± | 0.56± |
|                                        | 0.01  | 0.01  | 0.01  | 0.03  | 0.02  | 0.01  | 0.01  | 0.02  | 0.03  | 0.01  |
| T1                                     | 0.40± | 0.14± | 0.40± | 2.42± | 1.89± | 0.68± | 0.50± | 1.12± | 1.16± | 0.55± |
|                                        | 0.01  | 0.01  | 0.01  | 0.04  | 0.03  | 0.01  | 0.01  | 0.01  | 0.01  | 0.01  |
| T2                                     | 0.86± | 0.44± | 0.68± | 3.84± | 3.67± | 1.15± | 0.41± | 1.84± | 1.90± | 1.25± |
|                                        | 0.01  | 0.01  | 0.01  | 0.03  | 0.05  | 0.01  | 0.01  | 0.02  | 0.03  | 0.01  |
| Total (DSS, ProA,<br>RosA, SalB, SalA) | 35.70 | 34.09 | 38.13 | 44.12 | 49.82 | 68.53 | 65.87 | 56.81 | 69.02 | 65.05 |
| Total (CT, T1, T2,<br>ET1)             | 2.20  | 1.11  | 1.59  | 12.19 | 7.88  | 2.78  | 2.06  | 5.89  | 5.79  | 2.61  |
| Total (CT, T1, T2)                     | 2.18  | 1.11  | 1.42  | 9.03  | 7.37  | 2.52  | 1.68  | 4.87  | 4.91  | 2.36  |
| Total (SalB, CT, T1,<br>T2)            | 32.51 | 28.89 | 34.80 | 42.60 | 48.55 | 63.57 | 60.39 | 54.85 | 66.52 | 62.34 |
| Total (all)                            | 37.90 | 35.20 | 39.72 | 56.32 | 57.70 | 71.31 | 67.93 | 62.71 | 74.81 | 67.66 |

Table S2 Biopotency assay of ten samples (S1- S10) of SM

| Standard and SM | Mass concentration (mg ml <sup>-1</sup> ) | Bio-potency concentration (U ml <sup>-1</sup> ) | Inhibition (I%) | Biopotency (estimated) | Biopotency (measured) | Feasible limit (%) |
|-----------------|-------------------------------------------|-------------------------------------------------|-----------------|------------------------|-----------------------|--------------------|
| CT              | 0.004                                     | 4                                               | 95%             | 1000                   |                       |                    |
|                 | 0.0032                                    | 3.2                                             | 85%             |                        |                       |                    |
|                 | 0.00256                                   | 2.56                                            | 60%             |                        |                       |                    |
|                 | 0.002048                                  | 2.048                                           | 14%             |                        |                       |                    |
| S1              | 12                                        | 4                                               | 46.6%           | 0.3330                 | 0.1981                | 29.81%             |
|                 | 9.6                                       | 3.2                                             | 4.6%            |                        |                       |                    |
|                 | 7.68                                      | 2.56                                            | 1.7%            |                        |                       |                    |
|                 | 6.144                                     | 2.048                                           | 9.3%            |                        |                       |                    |
| S2              | 24                                        | 4                                               | 65.1%           | 0.1670                 | 0.1271                | 22.99%             |
|                 | 19.2                                      | 3.2                                             | 48.5%           |                        |                       |                    |
|                 | 15.36                                     | 2.56                                            | 28.0%           |                        |                       |                    |
|                 | 12.288                                    | 2.048                                           | 8.3%            |                        |                       |                    |
| S3              | 32                                        | 4                                               | 62.0%           | 0.1250                 | 0.1114                | 58.31%             |
|                 | 25.6                                      | 3.2                                             | 57.8%           |                        |                       |                    |
|                 | 20.48                                     | 2.56                                            | 52.2%           |                        |                       |                    |
|                 | 16.384                                    | 2.048                                           | 53.3%           |                        |                       |                    |
| S4              | 8                                         | 4                                               | 65.8%           | 0.5000                 | 0.3825                | 20.65%             |
|                 | 6.4                                       | 3.2                                             | 57.6%           |                        |                       |                    |
|                 | 5.12                                      | 2.56                                            | 21.0%           |                        |                       |                    |
|                 | 4.096                                     | 2.048                                           | 0.4%            |                        |                       |                    |
| S5              | 12                                        | 4                                               | 96.9%           | 0.2500                 | 0.2283                | 18.26%             |
|                 | 9.6                                       | 3.2                                             | 57.1%           |                        |                       |                    |
|                 | 7.68                                      | 2.56                                            | 53.3%           |                        |                       |                    |
|                 | 6.144                                     | 2.048                                           | 8.8%            |                        |                       |                    |
| S6              | 20                                        | 4                                               | 87.5%           | 0.2500                 | 0.2748                | 32.41%             |
|                 | 16                                        | 3.2                                             | 78.8%           |                        |                       |                    |
|                 | 12.8                                      | 2.56                                            | 65.4%           |                        |                       |                    |
|                 | 10.24                                     | 2.048                                           | 55.0%           |                        |                       |                    |
| S7              | 24                                        | 4                                               | 99.4%           | 0.1670                 | 0.2383                | 41.31%             |
|                 | 19.2                                      | 3.2                                             | 90.3%           |                        |                       |                    |
|                 | 15.36                                     | 2.56                                            | 87.5%           |                        |                       |                    |
|                 | 12.288                                    | 2.048                                           | 81.4%           |                        |                       |                    |
| S8              | 10                                        | 4                                               | 83.9%           | 0.4000                 | 0.3704                | 18.70%             |
|                 | 8                                         | 3.2                                             | 76.5%           |                        |                       |                    |
|                 | 6.4                                       | 2.56                                            | 59.7%           |                        |                       |                    |
|                 | 5.12                                      | 2.048                                           | 5.7%            |                        |                       |                    |
| S9              | 10                                        | 4                                               | 87.0%           | 0.4000                 | 0.3516                | 17.88%             |
|                 | 8                                         | 3.2                                             | 70.7%           |                        |                       |                    |

|     |       |       |       |        |        |        |
|-----|-------|-------|-------|--------|--------|--------|
|     | 6.4   | 2.56  | 33.1% |        |        |        |
|     | 5.12  | 2.048 | 9.6%  |        |        |        |
| S10 | 20    | 4     | 96.1% |        |        |        |
|     | 16    | 3.2   | 81.9% | 0.2000 | 0.2520 | 36.94% |
|     | 12.8  | 2.56  | 80.3% |        |        |        |
|     | 10.24 | 2.048 | 68.3% |        |        |        |

Table S3 Biopotency assay of constituents.

| Standard and constituents | Mass concentration (mg ml <sup>-1</sup> ) | Bio-potency concentration (U ml <sup>-1</sup> ) | Inhibition (I%) | Biopotency (estimated) | Biopotency (measured) | Feasible limit (%) |
|---------------------------|-------------------------------------------|-------------------------------------------------|-----------------|------------------------|-----------------------|--------------------|
| CT                        | 0.004                                     | 4                                               | 95%             |                        |                       |                    |
|                           | 0.0032                                    | 3.2                                             | 85%             | 1000                   |                       |                    |
|                           | 0.00256                                   | 2.56                                            | 60%             |                        |                       |                    |
|                           | 0.002048                                  | 2.048                                           | 14%             |                        |                       |                    |
| DDS                       | 0.8                                       | 4                                               | 97%             |                        |                       |                    |
|                           | 0.64                                      | 3.2                                             | 83%             | 5.00                   | 4.995                 | 17.51%             |
|                           | 0.512                                     | 2.56                                            | 52%             |                        |                       |                    |
|                           | 0.4096                                    | 2.048                                           | 0.2%            |                        |                       |                    |
| ProA                      | 0.781                                     | 4                                               | 95%             |                        |                       |                    |
|                           | 0.625                                     | 3.2                                             | 95%             | 5.12                   | 4.782                 | 15.35%             |
|                           | 0.5                                       | 2.56                                            | 23%             |                        |                       |                    |
|                           | 0.4                                       | 2.048                                           | 0.1%            |                        |                       |                    |
| RosA                      | 0.3                                       | 4                                               | 87%             |                        |                       |                    |
|                           | 0.24                                      | 3.2                                             | 16%             | 13.3                   | 9.869                 | 22.85%             |
|                           | 0.192                                     | 2.56                                            | 11%             |                        |                       |                    |
|                           | 0.1536                                    | 2.048                                           | 22%             |                        |                       |                    |
| SalB                      | 0.2                                       | 4                                               | 87%             |                        |                       |                    |
|                           | 0.16                                      | 3.2                                             | 64%             | 20.00                  | 18.92                 | 22.70%             |
|                           | 0.128                                     | 2.56                                            | 58%             |                        |                       |                    |
|                           | 0.1024                                    | 2.048                                           | 26%             |                        |                       |                    |
| SalA                      | 0.3                                       | 4                                               | 88%             |                        |                       |                    |
|                           | 0.24                                      | 3.2                                             | 72%             | 13.33                  | 13.287                | 24.14%             |
|                           | 0.192                                     | 2.56                                            | 59%             |                        |                       |                    |
|                           | 0.1536                                    | 2.048                                           | 36%             |                        |                       |                    |
| ET1                       | 0.1                                       |                                                 | 0               |                        | 0                     |                    |
| T1                        | 0.1                                       |                                                 | 0               |                        | 0                     |                    |
| T2                        | 0.1                                       |                                                 | 0               |                        | 0                     |                    |

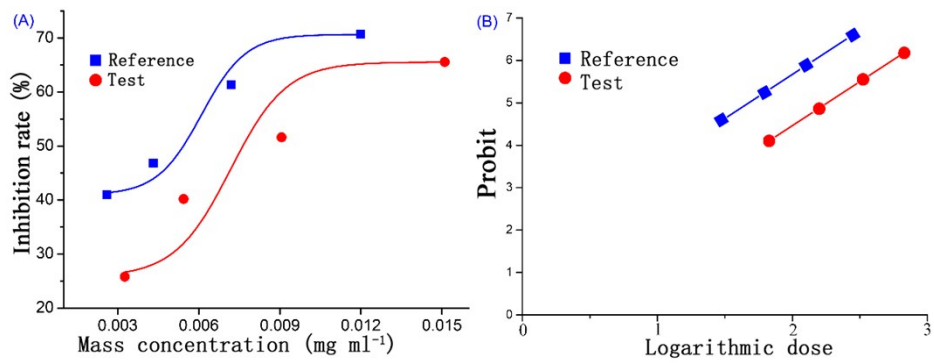

Fig. S1 Coordinate transformation of qualitative response: (A) is representative of the relationship between dose and inhibition rate; (B) is representative of the relationship between logarithmic dose and probit
